# Supplementary material
Source: PubMed Central journal article supplement (PMC4962882)
Supplement: NIHMS763307-supplement-Appendices.pdf [file NIHMS763307-supplement-Appendices.pdf]

Annex Table 1. Determinants of High Cost Loans, High Risk Loans, and Monthly Payment Amounts Used to Generate Adjusted Predictive Margins

|                                            | High Cost       | Combined Risk Loan |          |                |           |                         |          |                         |          |                                 |          | Monthly Payment Amount (\$) |           |                         |           |                         |           |                                 |           |            |           |
|--------------------------------------------|-----------------|--------------------|----------|----------------|-----------|-------------------------|----------|-------------------------|----------|---------------------------------|----------|-----------------------------|-----------|-------------------------|-----------|-------------------------|-----------|---------------------------------|-----------|------------|-----------|
|                                            | (1)             | (2)                |          | (3)            |           | (4)                     |          | (5)                     |          | (6)                             |          | (7)                         |           | (8)                     |           | (9)                     |           | (10)                            |           |            |           |
|                                            | Full Sample     | Full Sample        |          | Full Sample    |           | White Borrowers         |          | White Tracts            |          | White Borrowers in White Tracts |          | Full Sample                 |           | White Borrowers         |           | White Tracts            |           | White Borrowers in White Tracts |           |            |           |
|                                            | Odds Ratio      | Odds Ratio         | S.E.     | Odds Ratio     | S.E.      | Odds Ratio              | S.E.     | Odds Ratio              | S.E.     | Odds Ratio                      | S.E.     | OLS Coeff.                  | S.E.      | OLS Coeff.              | S.E.      | OLS Coeff.              | S.E.      | OLS Coeff.                      | S.E.      |            |           |
| <b>Reverse Redlining Indicators</b>        |                 |                    |          |                |           |                         |          |                         |          |                                 |          |                             |           |                         |           |                         |           |                                 |           |            |           |
| Borrower is Black                          | 2.523 ***       | 2.102 ***          | (0.3583) | 1.410          | (1.0778)  |                         |          |                         |          |                                 |          |                             |           |                         |           |                         |           |                                 |           |            |           |
| Census Tract % Black (continuous)          | 1.007 **        | 1.005 +            | (0.0025) |                |           |                         |          |                         |          |                                 |          |                             |           |                         |           |                         |           |                                 |           |            |           |
| 50% - 100% Black Tract (dichotomous)       |                 |                    |          | 1.421 +        | (0.2586)  |                         |          |                         |          |                                 |          | 4.773                       | (10.6044) |                         |           |                         |           |                                 |           |            |           |
| Black * Income > \$50,000                  |                 |                    |          | 0.993          | (0.2379)  |                         |          |                         |          |                                 |          | 13.415                      | (11.5920) |                         |           |                         |           |                                 |           |            |           |
| Black * Private Label Securitization       |                 |                    |          | 60.592 ***     | (28.6372) |                         |          |                         |          |                                 |          | 29.295 *                    | (12.2965) |                         |           |                         |           |                                 |           |            |           |
| <b>Borrower &amp; Loan Characteristics</b> |                 |                    |          |                |           |                         |          |                         |          |                                 |          |                             |           |                         |           |                         |           |                                 |           |            |           |
| Investor Occupant                          | 9.614 ***       | 2.936 ***          | (0.6057) | 2.828 ***      | (0.6413)  | 5.085 ***               | (1.6363) |                         |          |                                 |          | 8.845 ***                   | (3.4040)  | 53.415 ***              | (12.5849) | 41.213 *                | (20.6269) | 43.992 *                        | (21.2834) | 30.924 *** | (23.7149) |
| Borrower is a Woman                        | 1.144           | 1.054              | (0.1310) | 1.086          | (0.1513)  |                         |          |                         |          |                                 |          |                             |           |                         |           |                         |           |                                 |           |            |           |
| Borrower Income (Omitted: > \$150,000)     |                 |                    |          |                |           |                         |          |                         |          |                                 |          |                             |           |                         |           |                         |           |                                 |           |            |           |
| Less than \$40,000                         | 3.461 ***       | 3.618 ***          | (1.0495) | 3.987 ***      | (1.5210)  | 2.262                   | (1.1751) | 2.408 +                 | (1.1774) | 2.291                           | (1.5623) | -30.217                     | (22.0601) | -76.907 *               | (33.7742) | -58.030                 | (37.1155) | -83.352 ***                     | (41.0737) |            |           |
| \$40,000 - \$69,000                        | 2.928 ***       | 2.921 ***          | (0.7708) | 3.870 ***      | (1.2093)  | 2.009                   | (0.8515) | 2.335 *                 | (1.0062) | 4.701 **                        | (2.6106) | -22.384                     | (18.8430) | -54.815 *               | (26.3489) | -47.054                 | (30.0726) | -55.972 ***                     | (31.1060) |            |           |
| \$70,000 - \$99,000                        | 2.233 **        | 2.082 **           | (0.5448) | 2.788 **       | (0.8218)  | 1.703                   | (0.7321) | 1.653                   | (0.7156) | 2.525                           | (1.4562) | -18.478                     | (17.3631) | -52.448 *               | (23.4751) | -44.663 +               | (25.9977) | -53.665 ***                     | (26.8103) |            |           |
| \$100,000 - \$149,000                      | 1.337           | 1.615 +            | (0.4200) | 2.451 **       | (0.7181)  | 1.584                   | (0.6754) | 1.651                   | (0.6274) | 2.453 +                         | (1.3125) | -29.410                     | (22.5768) | -66.801 *               | (28.5870) | -46.645                 | (32.1232) | -71.808 ***                     | (32.0800) |            |           |
| Borrower Credit Score (10 points)          | 0.859 ***       | 0.868 ***          | (0.0223) | 0.931 *        | (0.0265)  | 0.921 *                 | (0.0302) | 0.854 ***               | (0.0357) | 0.904 +                         | (0.0547) | -5.040 ***                  | (1.0005)  | -4.821 **               | (1.4550)  | -7.187 ***              | (1.3294)  | -5.843 ***                      | (1.4281)  |            |           |
| Condominium Property                       | 0.669           | 0.750              | (0.2370) | 1.450          | (0.5471)  | 0.588                   | (0.3127) | 1.478                   | (0.4610) | 1.025                           | (0.4642) | -28.287                     | (19.7498) | -32.853                 | (26.9122) | -9.042                  | (28.2855) | -24.139 ***                     | (30.7948) |            |           |
| Combined Loan-to-Value (Omitted: <=80%)    |                 |                    |          |                |           |                         |          |                         |          |                                 |          |                             |           |                         |           |                         |           |                                 |           |            |           |
| 81% - 90%                                  | 2.825 ***       | 2.706 ***          | (0.4385) | 1.990 ***      | (0.3416)  | 4.435 ***               | (1.4793) | 2.710 ***               | (0.7300) | 3.367 **                        | (1.2956) | 28.576 **                   | (10.2827) | 55.067 **               | (17.0250) | 46.635 **               | (16.8393) | 53.215 ***                      | (19.5440) |            |           |
| 91% - 95%                                  | 2.538 ***       | 3.073 ***          | (0.4572) | 3.370 ***      | (0.5490)  | 2.551 **                | (0.6990) | 3.259 ***               | (0.8413) | 2.268 *                         | (0.7811) | 9.653                       | (13.0353) | -10.796                 | (23.3529) | -7.121                  | (24.7711) | -22.740 ***                     | (27.2287) |            |           |
| 96% - 100%                                 | 4.182 ***       | 6.597 ***          | (1.4136) | 3.042 ***      | (0.7262)  | 13.640 ***              | (6.2739) | 7.022 ***               | (2.6490) | 12.537 ***                      | (6.7526) | 80.556 ***                  | (16.0906) | 66.679 *                | (25.9474) | 63.424 *                | (27.9644) | 49.325 ***                      | (29.9137) |            |           |
| Low/No Documentation Loan                  | 1.949 ***       | 3.996 ***          | (0.6710) | 1.415 +        | (0.2616)  |                         |          |                         |          |                                 |          |                             |           |                         |           |                         |           |                                 |           |            |           |
| Loan Amount (\$10,000s)                    | 1.012           | 1.017 +            | (0.0091) | 1.011          | (0.0088)  | 0.980                   | (0.0144) | 0.997                   | (0.0122) | 0.992                           | (0.0164) | 60.625 ***                  | (1.0140)  | 58.478 ***              | (1.1720)  | 58.941 ***              | (1.2570)  | 58.473 ***                      | (1.2850)  |            |           |
| Refinance Loan                             | 0.878           | 0.811              | (0.1327) | 0.612 *        | (0.1437)  | 1.637                   | (0.5268) | 1.222                   | (0.3670) | 1.637                           | (0.6663) | 24.519 **                   | (9.4145)  | 28.603 +                | 16.0092   | 17.449                  | (16.1195) | 21.221 ***                      | (19.1098) |            |           |
| Cash-out Refinance Loan                    | 5.219 ***       | 4.652 ***          | (0.8142) | 3.170 ***      | (0.7550)  | 7.079 ***               | (2.4796) | 4.688 ***               | (1.4954) | 6.535 ***                       | (2.9555) | 40.671 ***                  | (11.4342) | 65.049 **               | (19.0397) | 60.964 **               | (19.3102) | 70.948 ***                      | (23.4642) |            |           |
| Amortization Term (Years)                  |                 |                    |          |                |           | 1.341 ***               | (0.0937) | 1.229 ***               | (0.0664) | 1.336 **                        | (0.1372) | -16.809 ***                 | (1.7694)  | -29.404 ***             | (3.1970)  | -29.401 ***             | (3.2176)  | -33.960 ***                     | (3.5534)  |            |           |
| <b>Census Tract Characteristics</b>        |                 |                    |          |                |           |                         |          |                         |          |                                 |          |                             |           |                         |           |                         |           |                                 |           |            |           |
| Change % Black > 10%, 1990-2000            | 1.315 +         | 1.538 **           | (0.2183) | 1.808 ***      | (0.2785)  |                         |          |                         |          |                                 |          |                             |           |                         |           |                         |           |                                 |           |            |           |
| Adults with College Degree <10%, 2000      | 1.360 +         | 1.163              | (0.1859) | 1.460 *        | (0.2580)  |                         |          |                         |          |                                 |          |                             |           |                         |           |                         |           |                                 |           |            |           |
| Poverty Rate >=40%, 2000                   | 1.571           | 1.406              | (0.3546) | 1.636          | (0.5288)  |                         |          |                         |          |                                 |          |                             |           |                         |           |                         |           |                                 |           |            |           |
| Foreclosure Rate, 2000                     | 1.219 *         | 1.103              | (0.0881) | 1.085          | (0.1040)  |                         |          |                         |          |                                 |          |                             |           |                         |           |                         |           |                                 |           |            |           |
| Rise in Home Prices, 2000-Peak             | 0.976 *         | 0.991              | (0.0089) | 0.993          | (0.0100)  |                         |          |                         |          |                                 |          |                             |           |                         |           |                         |           |                                 |           |            |           |
| Constant                                   | 210.064 **      | 57.231 *           | (96.562) | 0.048          | (0.0983)  | 0.0003 *                | (0.0010) | 0.8699                  | (2.8768) | 0.0006                          | (0.0034) | 892.662 ***                 | (92.465)  | 1261.628 ***            | (146.902) | 1420.872 ***            | (146.287) | 1474.117 ***                    | (156.079) |            |           |
| <b>N</b>                                   | <b>2,331</b>    | <b>2,394</b>       |          | <b>2,394</b>   |           | <b>1,211</b>            |          | <b>1,197</b>            |          | <b>957</b>                      |          | <b>2,398</b>                |           | <b>1,207</b>            |           | <b>1,193</b>            |           | <b>954</b>                      |           |            |           |
| <b>Pseudo R<sup>2</sup></b>                | <b>0.486</b>    | <b>0.390</b>       |          | <b>0.481</b>   |           | <b>0.388</b>            |          | <b>0.396</b>            |          | <b>0.387</b>                    |          | <b>0.939</b>                |           | <b>0.934</b>            |           | <b>0.931</b>            |           | <b>0.933</b>                    |           |            |           |
| <b>Average Predictive Margin</b>           | <b>0.399</b>    | <b>0.282</b>       |          | <b>0.282</b>   |           | <b>0.121</b>            |          | <b>0.145</b>            |          | <b>0.091</b>                    |          | <b>1,098.05</b>             |           | <b>1,401.13</b>         |           | <b>1,457.15</b>         |           | <b>1,533.20</b>                 |           |            |           |
| <b>Black Borrowers</b>                     |                 |                    |          | <b>0.302</b>   |           |                         |          |                         |          |                                 |          | <b>1,122.42</b>             |           |                         |           |                         |           |                                 |           |            |           |
| <b>Borrowers in Black Tracts</b>           |                 |                    |          | <b>0.293</b>   |           |                         |          |                         |          |                                 |          | <b>1,113.69</b>             |           |                         |           |                         |           |                                 |           |            |           |
| <b>Blacks in Black Tracts</b>              |                 |                    |          | <b>0.312</b>   |           |                         |          |                         |          |                                 |          | <b>1,125.77</b>             |           |                         |           |                         |           |                                 |           |            |           |
| <b>Blacks in White Tracts</b>              |                 |                    |          | <b>0.142</b>   |           |                         |          |                         |          |                                 |          | <b>1,500.08</b>             |           |                         |           |                         |           |                                 |           |            |           |
| <b>Whites in Black Tracts</b>              |                 |                    |          | <b>0.163</b>   |           |                         |          |                         |          |                                 |          | <b>1,419.07</b>             |           |                         |           |                         |           |                                 |           |            |           |
| <b>Corresponding Table/Figure</b>          | <b>Figure 1</b> | <b>Figure 2</b>    |          | <b>Table 3</b> |           | <b>Tables 4 &amp; 5</b> |          | <b>Tables 4 &amp; 5</b> |          | <b>Tables 4 &amp; 5</b>         |          | <b>Table 2</b>              |           | <b>Tables 4 &amp; 5</b> |           | <b>Tables 4 &amp; 5</b> |           | <b>Tables 4 &amp; 5</b>         |           |            |           |

Odds Ratios ((1)-(6)) or OLS coefficients ((7)-(10)) with robust standard errors in parentheses. Full sample includes only black and white borrowers. Note: White tracts label refers to 0%-50% black tracts. Combined Risk Loan consists of High Cost Subprime Loans plus at least two additional high risk features: Adjustable Rate, Interest Only Amortization, Low/No Documentation, CLTV>90%, Balloon, Prepayment Penalty, or Debt-to-Income Ratio > 55%.

\*\*\* p < .001 \*\* p < .01 \* p < .05 + p < .10 (two-tailed tests)

**Appendix Table 2. Determinants of Foreclosure Used to Generate Adjusted Predictive Margins**

|                                                       | Entered Foreclosure |           |                |      |                                 |           | Lost Home to Foreclosure |          |                |          |                                 |          |
|-------------------------------------------------------|---------------------|-----------|----------------|------|---------------------------------|-----------|--------------------------|----------|----------------|----------|---------------------------------|----------|
|                                                       | (1)                 |           | (2)            |      | (3)                             |           | (4)                      |          | (5)            |          | (6)                             |          |
|                                                       | White Borrowers     |           | White Tracts   |      | White Borrowers in White Tracts |           | White Borrowers          |          | White Tracts   |          | White Borrowers in White Tracts |          |
|                                                       | Odds Ratio          | S.E.      | Odds Ratio     | S.E. | Odds Ratio                      | S.E.      | Odds Ratio               | S.E.     | Odds Ratio     | S.E.     | Odds Ratio                      | S.E.     |
| <b>Predicted Cost and Risk of Lending<sup>a</sup></b> |                     |           |                |      |                                 |           |                          |          |                |          |                                 |          |
| Predicted Monthly Payment (\$100s)                    | 1.022               | (0.0597)  | 1.047          |      | 1.084                           | (0.0734)  | 1.030                    | (0.0648) | 1.135 *        | (0.0695) | 1.118                           | (0.0859) |
| Predicted Probability of Combined Risk Loan           | 10.667 ***          | (4.8310)  | 6.879 ***      |      | 6.952 ***                       | (3.5634)  | 8.765 ***                | (4.8356) | 5.337 ***      | (2.2158) | 6.627 **                        | (4.1987) |
| <b>Borrower &amp; Loan Characteristics</b>            |                     |           |                |      |                                 |           |                          |          |                |          |                                 |          |
| Investor Occupant                                     | 1.619               | (1.0208)  | 4.003 **       |      | 4.153 +                         | (3.1461)  | 0.847                    | (0.5759) | 2.108          | (1.1730) | 1.550                           | (1.3699) |
| No Co-Signer on Mortgage Loan                         | 4.141 **            | (1.7291)  | 3.364 **       |      | 6.415 **                        | (3.4746)  | 4.352 **                 | (2.3387) | 2.498 *        | (1.0495) | 4.076 *                         | (2.5134) |
| Borrower Income (Omitted: > \$150,000)                |                     |           |                |      |                                 |           |                          |          |                |          |                                 |          |
| Less than \$40,000                                    | 2.210               | (1.8518)  | 1.937          |      | 3.373                           | (3.6648)  | 0.927                    | (0.8691) | 1.724          | (1.5438) | 1.111                           | (1.3532) |
| \$40,000 - \$69,000                                   | 0.589               | (0.4561)  | 0.837          |      | 1.087                           | (0.9652)  | 0.480                    | (0.4301) | 1.335          | (1.0776) | 0.807                           | (0.8585) |
| \$70,000 - \$99,000                                   | 0.862               | (0.5487)  | 0.699          |      | 0.787                           | (0.7064)  | 0.642                    | (0.5014) | 0.900          | (0.7343) | 0.553                           | (0.6016) |
| \$100,000 - \$149,000                                 | 1.288               | (0.8076)  | 1.040          |      | 1.777                           | (1.3041)  | 1.105                    | (0.8352) | 2.172          | (1.4621) | 1.751                           | (1.5900) |
| Borrower Credit Score (10 points)                     | 0.963 **            | (0.0115)  | 0.930 ***      |      | 0.938 ***                       | (0.0165)  | 0.974 *                  | (0.0120) | 0.953 **       | (0.0134) | 0.948 **                        | (0.0148) |
| Condominium Property                                  | 0.098 **            | (0.0730)  | 1.154          |      | 0.100 **                        | (0.0835)  | 1.312                    | (0.7244) | 1.194          | (0.8112) |                                 |          |
| Combined Loan-to-Value (Omitted: <=80%)               |                     |           |                |      |                                 |           |                          |          |                |          |                                 |          |
| 81% - 90%                                             | 1.636               | (0.8011)  | 1.665          |      | 2.866 +                         | (1.6799)  | 1.093                    | (0.5802) | 1.315          | (0.5927) | 1.812                           | (1.1691) |
| 91% - 95%                                             | 0.926               | (0.4147)  | 1.309          |      | 1.104                           | (0.5495)  | 5.513 *                  | (4.6715) | 1.647          | (0.7455) | 1.290                           | (0.7275) |
| 96% - 100%                                            | 13.420 **           | (10.6163) | 8.777 ***      |      | 39.017 ***                      | (38.7227) | 0.991                    | (0.0416) | 4.392 *        | (2.8314) | 7.890 *                         | (7.7889) |
| Loan Amount (\$10,000s)                               | 1.029               | (0.0394)  | 1.014          |      | 1.010                           | (0.0476)  | 1.992                    | (1.1139) | 0.949          | (0.0386) | 0.954                           | (0.0503) |
| Refinance Loan                                        | 4.651 **            | (2.5699)  | 3.163 **       |      | 9.134 **                        | (6.0503)  | 1.033                    | (0.1288) | 1.555          | (0.6894) | 2.520                           | (1.6477) |
| <b>Community Level Characteristics</b>                |                     |           |                |      |                                 |           |                          |          |                |          |                                 |          |
| Change Unemployment Rate since Origination            | 1.114               | (0.1145)  | 1.203 *        |      | 1.148                           | (0.1256)  | 1.414                    | (0.4252) | 1.127          | (0.1093) | 1.049                           | (0.1350) |
| 10% Fall in Zip Code Home Price Index                 | 1.321               | (0.3190)  | 0.897          |      | 0.799                           | (0.2530)  | 0.900                    | (0.2134) | 0.825          | (0.2141) | 0.878                           | (0.3250) |
| Neighborhood Foreclosure Rate, End Year               | 0.909               | (0.2040)  | 1.028          |      | 1.119                           | (0.3370)  | 1.848                    | (0.7782) | 1.070          | (0.2434) | 1.229                           | (0.3822) |
| <10% Adults in Tract with College Degree              | 1.118               | (0.4376)  | 1.243          |      | 0.993                           | (0.5169)  | 0.569                    | (0.4600) | 2.734 **       | (1.0457) | 1.563                           | (0.7935) |
| Constant                                              | 0.003 ***           | (0.0049)  | 0.139          |      | 0.008 *                         | (0.0148)  | 0.005 **                 | (0.0079) | 0.044 +        | (0.0715) | 0.029 +                         | (0.0554) |
| <b>N</b>                                              | <b>1,160</b>        |           | <b>1,145</b>   |      | <b>925</b>                      |           | <b>1,158</b>             |          | <b>1,142</b>   |          | <b>923</b>                      |          |
| <b>Pseudo R<sup>2</sup></b>                           | <b>0.331</b>        |           | <b>0.301</b>   |      | <b>0.377</b>                    |           | <b>0.274</b>             |          | <b>0.244</b>   |          | <b>0.274</b>                    |          |
| <b>Adjusted Predictive Margin</b>                     | <b>0.053</b>        |           | <b>0.073</b>   |      | <b>0.043</b>                    |           | <b>0.034</b>             |          | <b>0.040</b>   |          | <b>0.027</b>                    |          |
| <b>Out-of-Sample</b>                                  |                     |           |                |      |                                 |           |                          |          |                |          |                                 |          |
| <b>Black Borrowers</b>                                | <b>0.104</b>        |           |                |      |                                 |           | <b>0.066</b>             |          |                |          |                                 |          |
| <b>Borrowers in Black Tracts</b>                      |                     |           | <b>0.114</b>   |      |                                 |           |                          |          | <b>0.067</b>   |          |                                 |          |
| <b>Blacks in Black Tracts</b>                         |                     |           |                |      | <b>0.093</b>                    |           |                          |          |                |          | <b>0.062</b>                    |          |
| <b>Blacks in White Tracts</b>                         |                     |           |                |      | <b>0.128</b>                    |           |                          |          |                |          | <b>0.086</b>                    |          |
| <b>Whites in Black Tracts</b>                         |                     |           |                |      | <b>0.068</b>                    |           |                          |          |                |          | <b>0.055</b>                    |          |
| <b>Corresponding Table/Figure</b>                     | <b>Table 4</b>      |           | <b>Table 4</b> |      | <b>Table 4</b>                  |           | <b>Table 5</b>           |          | <b>Table 5</b> |          | <b>Table 5</b>                  |          |

Odds Ratios with robust standard errors in parentheses. <sup>a</sup>Predicted values for each sub-sample borrower are adjusted predictive margins based on corresponding sub-sample estimations of combined risk lending and
